# Supplementary material for: Highly efficient ITO-free organic solar cells with a column-patterned microcavity
Source: Royal Society of Chemistry journal article supplement (doi:10.1039/d0ee03387a), 2021-01-01
Supplement: d0ee03387a1.pdf [file d0ee03387a1.pdf]

## Electronic supplementary Information

### Highly Efficient ITO-free Organic Solar Cells with the Column-Patterned Microcavity

Jiang Huang<sup>a</sup>, Dan Zhao<sup>a</sup>, Zifan Dou<sup>a</sup>, Qingshan Fan<sup>a</sup>, Na Li<sup>a</sup>, Shuihai Peng<sup>a</sup>, Haoran Liu<sup>b</sup>, Yadong Jiang<sup>\*a</sup>, Junsheng Yu<sup>\*a</sup> and Chang-Zhi Li<sup>\*b</sup>

<sup>a</sup> State Key Laboratory of Electronic Thin Films and Integrated Devices, School of Optoelectronic Science and Engineering, University of Electronic Science and Technology of China (UESTC), Chengdu 610054, P.R. China

Email: jiangyd@uestc.edu.cn, jsyu@uestc.edu.cn

<sup>b</sup> State Key Laboratory of Silicon Materials, Department of Polymer Science MOE Key Laboratory of Macromolecular Synthesis and Functionalization and Engineering, Zhejiang University, Hangzhou 310027, P. R. China

Email: czli@zju.edu.cn

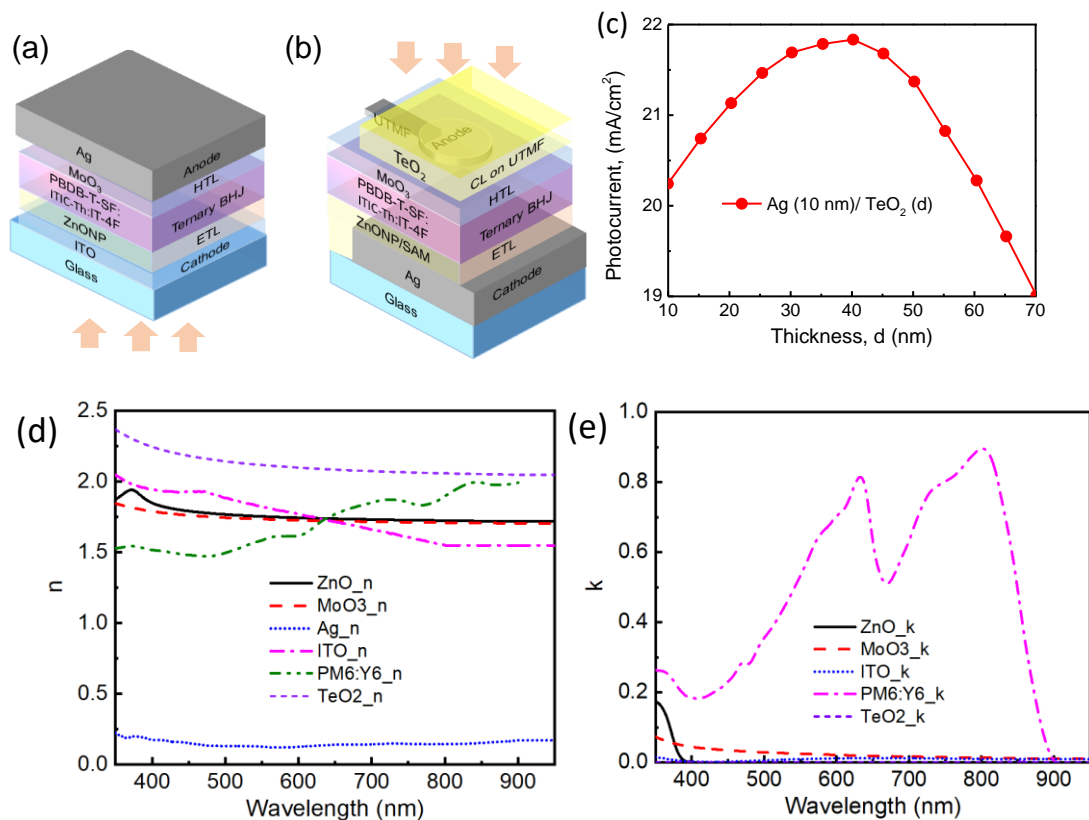

**Figure S1.** Device architectures of ITO (a) and planar microcavity (MC) OSCs (b) with PBDB-T-SF:ITIC-Th:IT-4F BHJ. (c) the dependence of TeO<sub>2</sub> thickness on the photocurrent of planar MC device. (d) and (e) are refractive index n and k of materials used in this work.

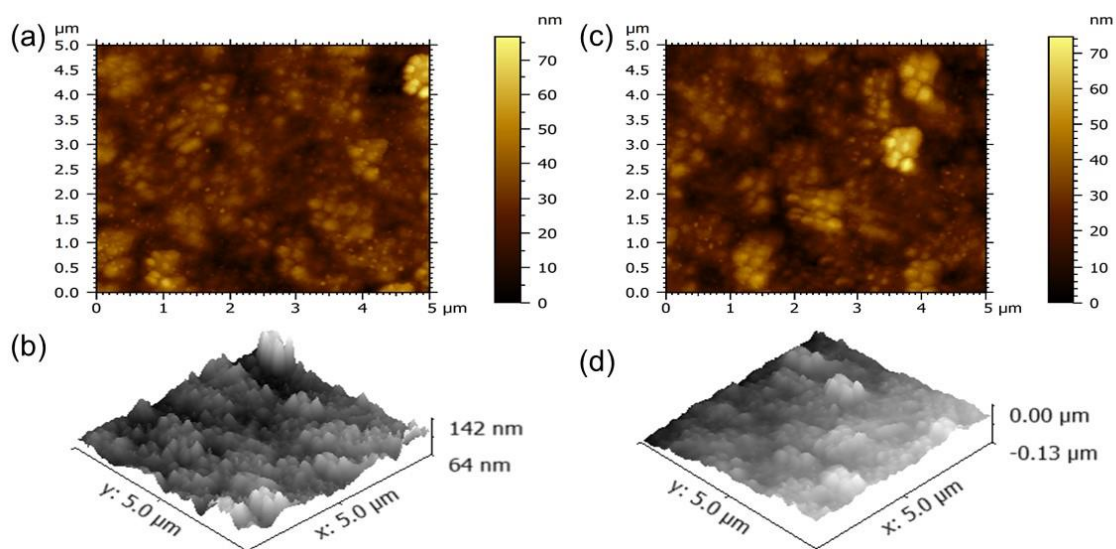

**Figure S2.** (a, b) AFM images of binary PBDB-T-SF:IT-4F (1:1) and (c, d) ternary PBDB-T-SF:ITIC-Th:IT-4F (1:0.2:0.8) BHJ layers.

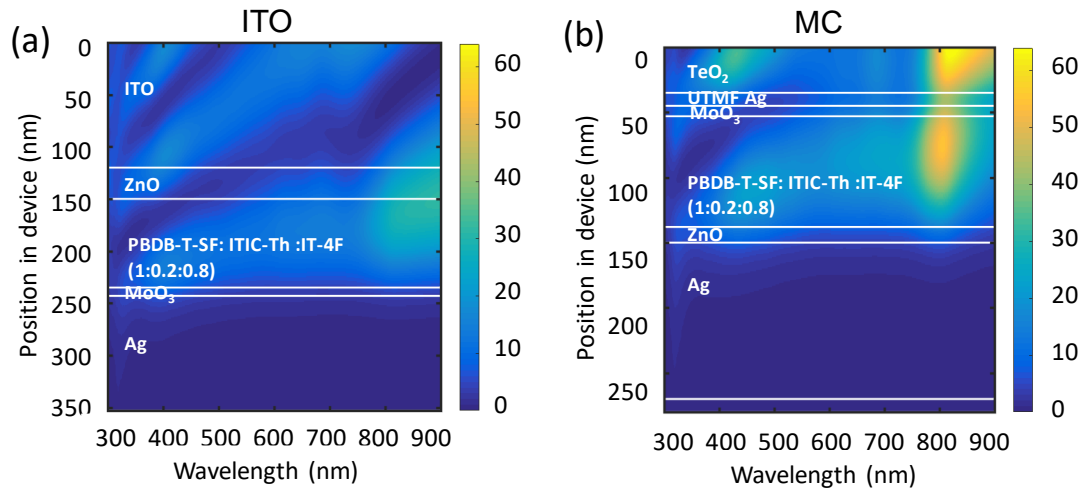

**Figure S3.** Light distribution of  $|E|^2$  in the PBDB-T-SF:ITIC-Th:IT-4F (1:0.2:0.8) BHJ with (a) ITO and (b) microcavity devices.

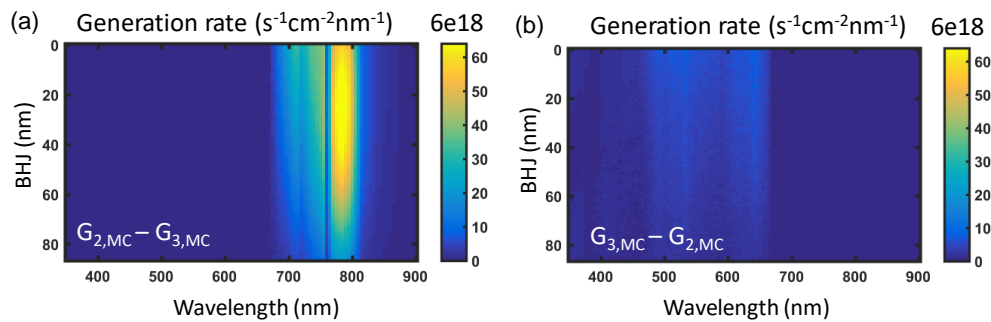

**Figure S4.** Difference of exciton generation rate ( $G$ ) (a)  $G_{2,MC} - G_{3,MC}$  and (b)  $G_{3,MC} - G_{2,MC}$  of planar MC devices. The  $G_3$  is exciton generation rate of ternary device,  $G_2$  is exciton generation rate of binary device.

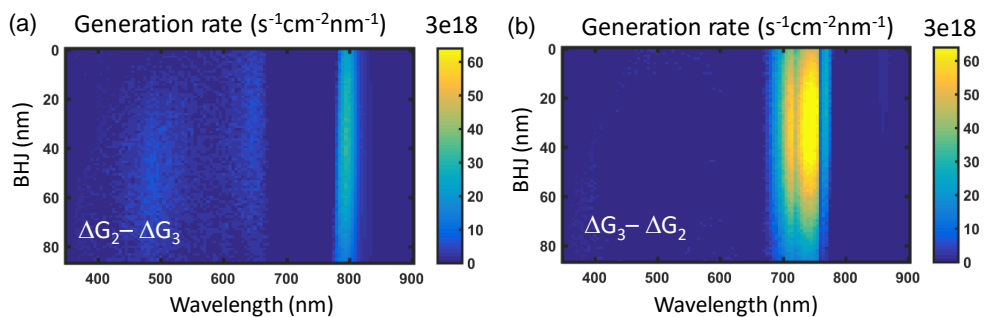

**Figure S5.** Improvement difference of exciton generation rate ( $\Delta G$ ) (a)  $\Delta G_2 - \Delta G_3$  and (b)  $\Delta G_3 - \Delta G_2$ .  $\Delta G_2 = G_{2,MC} - G_{2,ITO}$  is the  $G$  improvement of binary planar MC and ITO device.  $\Delta G_3 = G_{3,MC} - G_{3,ITO}$  is the  $G$  improvement of ternary planar MC and ITO device.

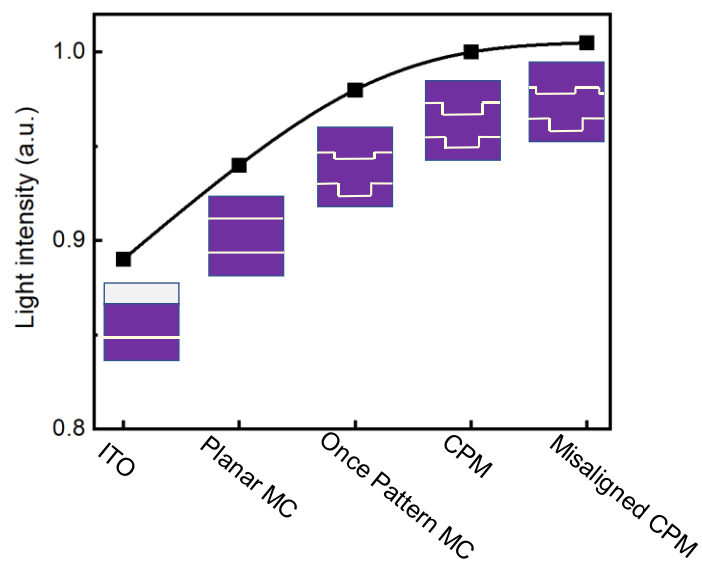

**Figure S6.** Light intensity comparison of OSCs based on PBDB-T-SF:IT-4F BHJs with different vertical morphology models.

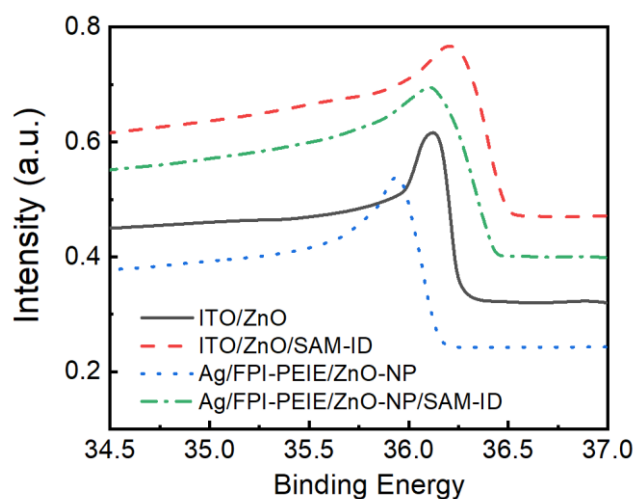

**Figure S7.** UPS of ZnO and ZnO-NP with and without SAM modification on ITO and Ag/FPI-PEIE electrodes.

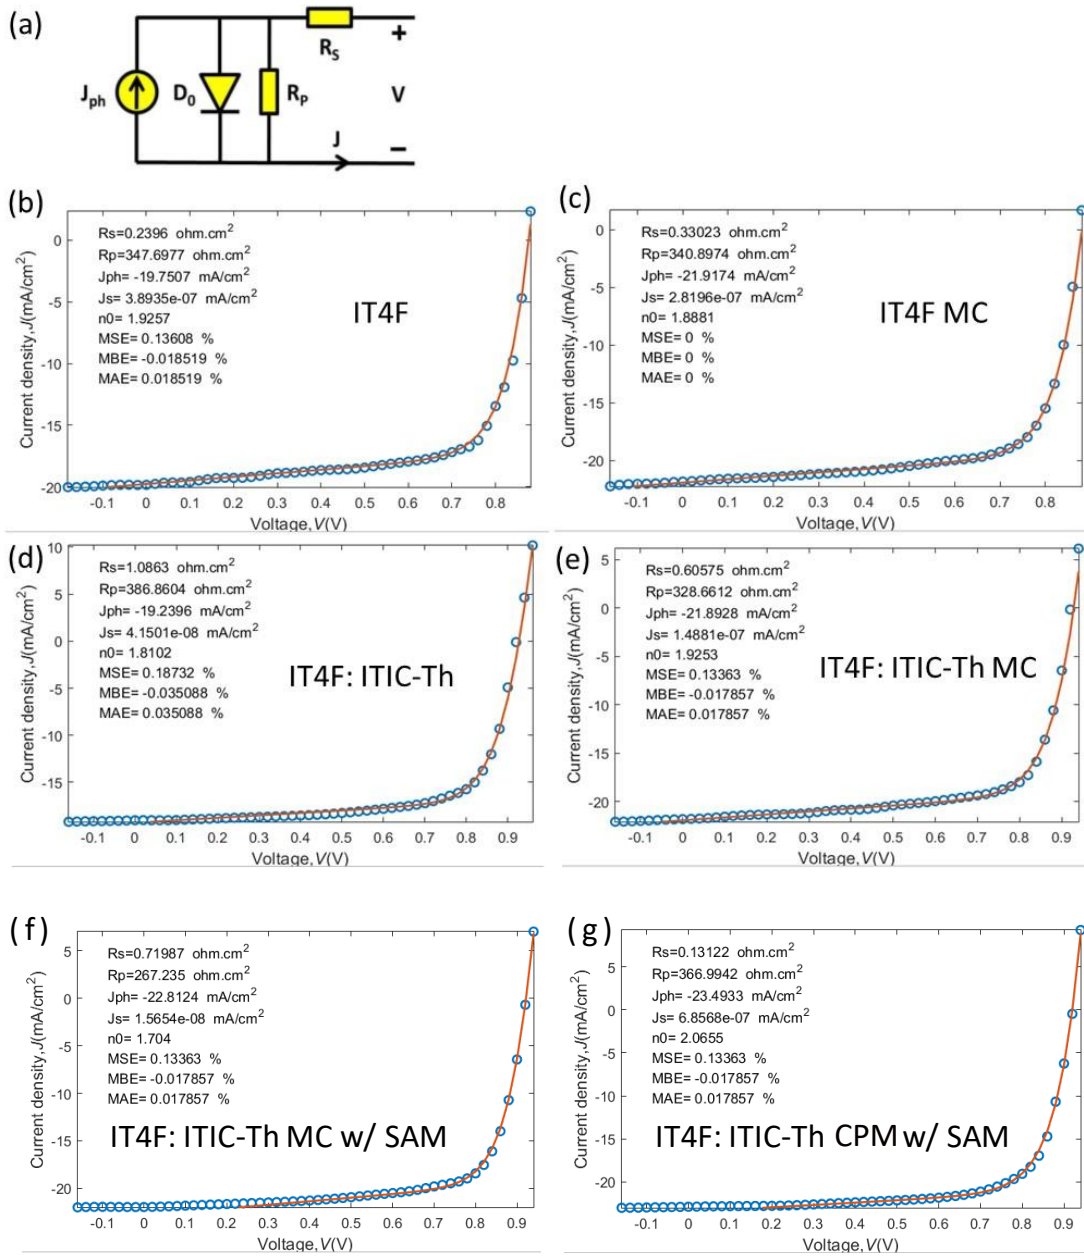

**Figure S8.** Fittings of J-V curves for extracting equivalent circuit parameters of ITO and microcavity devices.

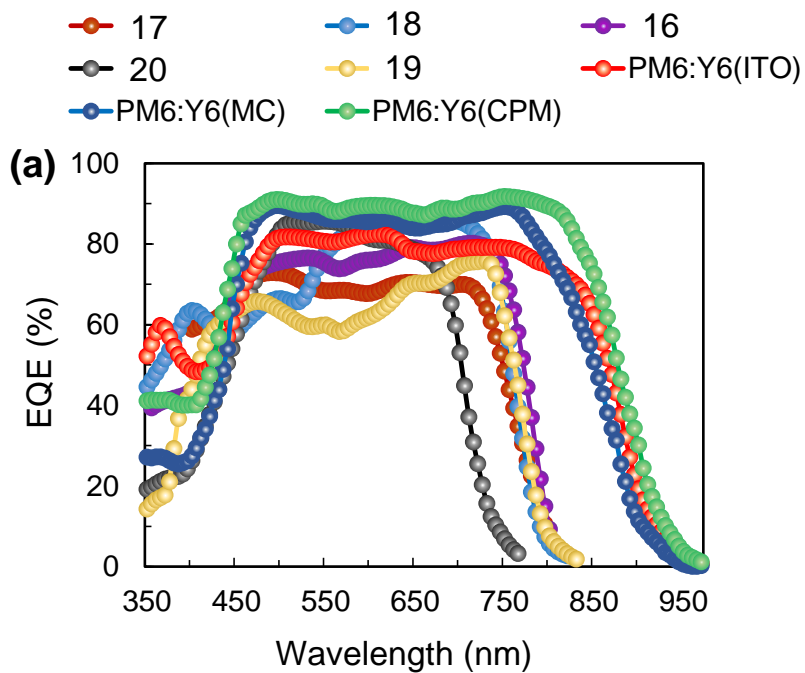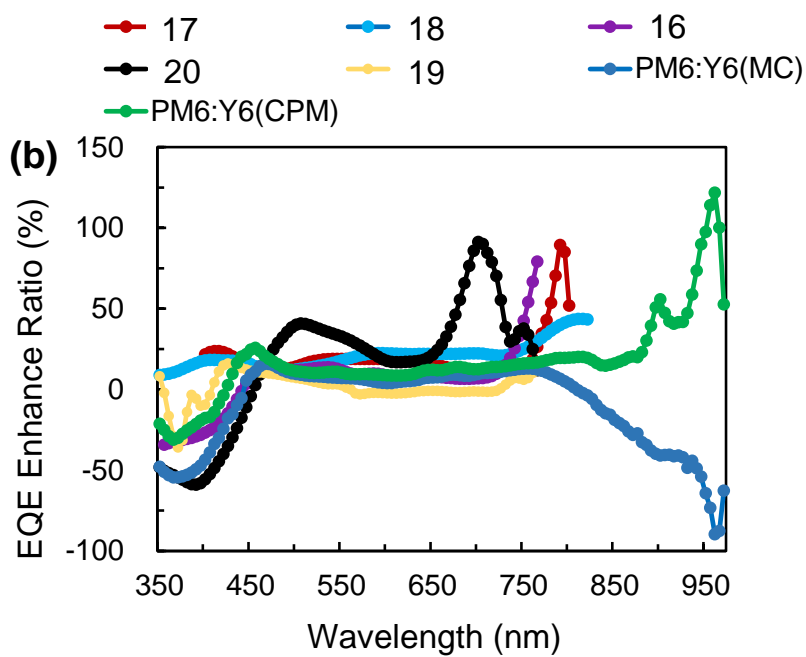

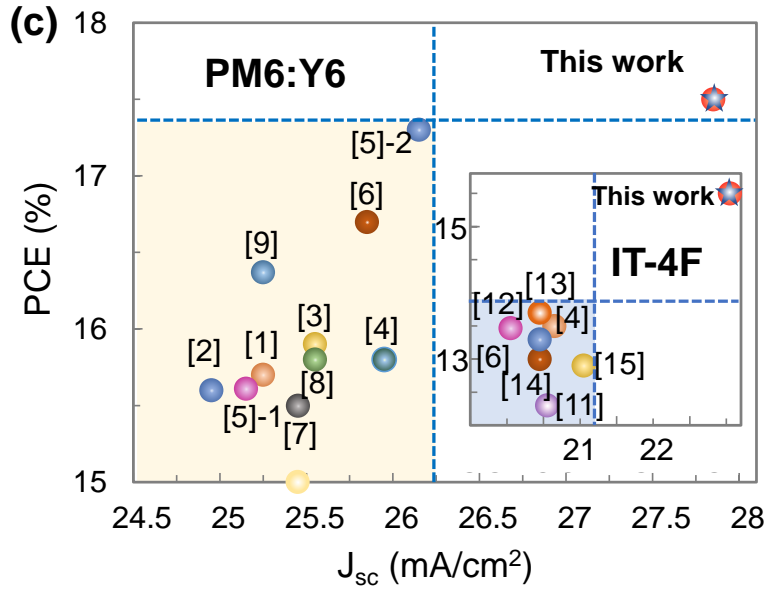

**Figure S9.** (a) EQE spectra and (b) enhancement ratios (by comparing with the corresponding ITO devices) of OSCs with different optical absorption enhance architectures. (c) The  $J_{sc}$  versus PCE comparison of this work and reported OSCs based on PM6:Y6 and IT-4F BHJs.

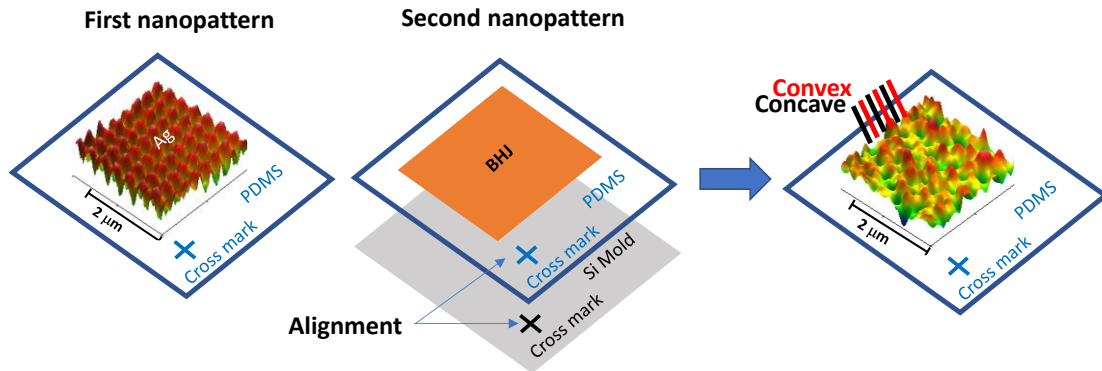

**Figure S10.** First nanopattern on PDMS templet film and second nanopattern on BHJ film by aligning the cross marks on PDMS and Si mold.

**Table S1.** The work function and contact angle characteristics of ITO/ZnO, ITO/ZnO/SAM-ID, Ag/FPI-PEIE/ZnO-NP, Ag/FPI-PEIE/ZnO-NP/SAM-ID films.

| Film                      | Work function (eV) | Contact angle (°) |
|---------------------------|--------------------|-------------------|
| ITO/ZnO                   | 3.75               | 54.9              |
| ITO/ZnO/SAM-ID            | 3.48               | 75.8              |
| Ag/FPI-PEIE/ZnO-NP        | 3.86               | 49.3              |
| Ag/FPI-PEIE/ZnO-NP/SAM-ID | 3.52               | 72.5              |

**Table S2.** Photovoltaic parameters of OSCs with an ITO configuration and microcavity configuration.

| BHJ of OSC<br>(86 ± 3 nm)                                | $J_0$<br>(mA/cm <sup>2</sup> ) | $J_s$<br>(mA/cm <sup>2</sup> ) | $n$  | $R_s$<br>(Ω·cm <sup>2</sup> ) | $R_p$<br>(Ω·cm <sup>2</sup> ) |
|----------------------------------------------------------|--------------------------------|--------------------------------|------|-------------------------------|-------------------------------|
| PBDB-T-SF:IT-4F<br>(1:1, ITO) <sup>a</sup>               | 19.75                          | 3.89×10 <sup>-7</sup>          | 1.93 | 0.23                          | 347                           |
| PBDB-T-SF:IT-4F<br>(1:1, planar MC) <sup>a</sup>         | 21.92                          | 2.82×10 <sup>-7</sup>          | 1.89 | 0.33                          | 340                           |
| PBDB-T-SF:ITIC-Th:IT-4F<br>(1:0.2:0.8, ITO)              | 19.24                          | 4.15×10 <sup>-8</sup>          | 1.81 | 1.08                          | 386                           |
| PBDB-T-SF:ITIC-Th:IT-4F<br>(1:0.2:0.8, planar MC)        | 21.89                          | 1.49×10 <sup>-7</sup>          | 1.93 | 0.61                          | 328                           |
| PBDB-T-SF:ITIC-Th:IT-4F<br>(1:0.2:0.8, planar MC w/ SAM) | 22.81                          | 1.56×10 <sup>-8</sup>          | 1.70 | 0.72                          | 267                           |
| PBDB-T-SF:ITIC-Th:IT-4F<br>(1:0.2:0.8, CPM w/ SAM)       | 23.49                          | 6.86×10 <sup>-7</sup>          | 2.07 | 0.13                          | 367                           |



**Table S3.** Photovoltaic parameters of OSCs with an ITO configuration and microcavity configuration.

| Structure of OSC                                   | $V_{oc}$<br>(V) | $J_{sc}$<br>(mA/cm <sup>2</sup> ) | $FF$<br>(%) | PCE<br>(%) <sup>a)</sup> | <i>Ref</i> |
|----------------------------------------------------|-----------------|-----------------------------------|-------------|--------------------------|------------|
| PM6:Y6 (ITO)                                       | 0.85            | 24.9                              | 73.7        | 15.5                     | This work  |
| PM6:Y6 (CPM w/ SAM)                                | 0.85            | 27.8                              | 74.5        | 17.5                     | This work  |
| PM6:Y6                                             | 0.82            | 25.2                              | 76.1        | 15.7                     | [1]        |
| PM6:Y6                                             | 0.83            | 24.9                              | 75.3        | 15.6                     | [2]        |
| PM6:Y6                                             | 0.84            | 25.5                              | 74.0        | 15.9                     | [3]        |
| PM6:Y6 (WS <sub>2</sub> )                          | 0.84            | 25.9                              | 73.0        | 15.8                     | [4]        |
| PM6:Y6:PC <sub>71</sub> BM (WS <sub>2</sub> )      | 0.84            | 26.0                              | 78.0        | 17.0                     | [4]        |
| PM6:Y6 (CN)                                        | 0.844           | 25.1                              | 73.66       | 15.61                    | [5]        |
| PM6:Y6 (GCL)                                       | 0.84            | 26.09                             | 79.05       | 17.32                    | [5]        |
| PM6:Y6 (SD)                                        | 0.844           | 25.8                              | 76.7        | 16.7                     | [6]        |
| PM6:Y6                                             | 0.839           | 25.37                             | 73.0        | 15.5                     | [7]        |
| PM6:Y6                                             | 0.86            | 25.5                              | 72.0        | 15.8                     | [8]        |
| PM6:Y6                                             | 0.84            | 25.19                             | 77.3        | 16.37                    | [9]        |
| AgNWs/PBDB-T-2F:Y6                                 | 0.83            | 25.4                              | 71.0        | 15.03                    | [10]       |
| PBDB-T-SF:IT-4F:                                   | 0.87            | 19.8                              | 71.9        | 12.4                     | This work  |
| PBDB-T-SF:ITIC-Th:IT-4F<br>(1:0.2:0.8, CPM w/ SAM) | 0.93            | 22.9                              | 72.7        | 15.5                     | This work  |
| PBDB-T-SF:IT-4F (WS <sub>2</sub> )                 | 0.88            | 20.6                              | 74.0        | 13.5                     | [4]        |
| IT-4F (SD)                                         | 0.867           | 20.4                              | 75.4        | 13.3                     | [6]        |
| AgNWs/PBDB-T-2F:IT-4F                              | 0.82            | 21.0                              | 75.0        | 12.9                     | [10]       |
| PBDB-T-2F:IT-4F                                    | 0.82            | 20.5                              | 73.0        | 12.3                     | [11]       |
| PBDB-T-2Cl:IT-4F                                   | 0.88            | 19.9                              | 76.4        | 13.47                    | [12]       |
| PBDB-TF:IT-4F                                      | 0.87            | 20.4                              | 77.0        | 13.7                     | [13]       |
| PM6:IT-4F                                          | 0.86            | 20.4                              | 74.0        | 13.0                     | [14]       |

## References:

- [1] J. Yuan, Y. Zhang, L. Zhou, G. Zhang, H.-L. Yip, T.-K. Lau, X. Lu, C. Zhu, H. Peng, P. A. Johnson, M. Leclerc, Y. Cao, J. Ulanski, Y. Li and Y. Zou, *Joule*, 2019, 3, 1140-1151.
- [2] Y. Cui, H. Yao, J. Zhang, T. Zhang, Y. Wang, L. Hong, K. Xian, B. Xu, S. Zhang, J. Peng, Z. Wei, F. Gao and J. Hou, *Nat Commun*, 2019, 10, 2515.
- [3] J. Song, C. Li, L. Zhu, J. Guo, J. Xu, X. Zhang, K. Weng, K. Zhang, J. Min, X. Hao, Y. Zhang, F. Liu and Y. Sun, *Advanced Materials*, 2019, 31, 1905645.
- [4] Y. Lin, B. Adilbekova, Y. Firdaus, E. Yengel, H. Faber, M. Sajjad, X. Zheng, E. Yarali, A. Seitkhan, O. M. Bakr, A. El-Labban, U. Schwingenschlögl, V. Tung, I. McCulloch, F. Laquai and T. D. Anthopoulos, *Advanced Materials*, 2019, 31, 1902965.
- [5] L. Liu, Y. Kan, K. Gao, J. Wang, M. Zhao, H. Chen, C. Zhao, T. Jiu, A.-K.-Y. Jen and Y. Li, *Advanced Materials*, 2020, 32, 1907604.
- [6] H. Fu, W. Gao, Y. Li, F. Lin, X. Wu, J. H. Son, J. Luo, H. Y. Woo, Z. Zhu and A. K.-Y. Jen, *Small Methods*, n/a, 2000687.
- [7] R. Ma, T. Liu, Z. Luo, Q. Guo, Y. Xiao, Y. Chen, X. Li, S. Luo, X. Lu, M. Zhang, Y. Li and H. Yan, *Science China Chemistry*, 2020, 63, 325-330.
- [8] J. Wu, G. Li, J. Fang, X. Guo, L. Zhu, B. Guo, Y. Wang, G. Zhang, L. Arunagiri, F. Liu, H. Yan, M. Zhang and Y. Li, *Nature Communications*, 2020, 11, 4612.
- [9] Z. Luo, R. Ma, T. Liu, J. Yu, Y. Xiao, R. Sun, G. Xie, J. Yuan, Y. Chen, K. Chen, G. Chai, H. Sun, J. Min, J. Zhang, Y. Zou, C. Yang, X. Lu, F. Gao and H. Yan, *Joule*, 2020, 4, 1236-1247.
- [10] F. Qin, W. Wang, L. Sun, X. Jiang, L. Hu, S. Xiong, T. Liu, X. Dong, J. Li, Y. Jiang, J. Hou, K. Fukuda, T. Someya and Y. Zhou, *Nature Communications*, 2020, 11, 4508.
- [11] X. Dong, P. Shi, L. Sun, J. Li, F. Qin, S. Xiong, T. Liu, X. Jiang and Y. Zhou, *Journal of Materials Chemistry A*, 2019, 7, 1989-1995.
- [12] R. Ma, Y. Chen, T. Liu, Y. Xiao, Z. Luo, M. Zhang, S. Luo, X. Lu, G. Zhang, Y. Li, H. Yan and K. Chen, *Journal of Materials Chemistry C*, 2020, 8, 909-915.
- [13] W. Li, L. Ye, S. Li, H. Yao, H. Ade and J. Hou, *Advanced Materials*, 2018, 30, 1707170.
- [14] J. Wan, L. Zhang, Q. He, S. Liu, B. Huang, L. Hu, W. Zhou and Y. Chen, *Advanced Functional Materials*, 2020, 30, 1909760.
- [15] Z. Zhang, H. Wang, J. Yu, R. Sun, J. Xu, L. Yang, R. Geng, J. Cao, F. Du, J. Min, F. Liu and W. Tang, *Chemistry of Materials*, 2020, 32, 1297-1307.
- [16] J. Huang, C. Z. Li, C. C. Chueh, S. Q. Liu, J. S. Yu and A. K. Y. Jen, *Advanced*

Energy Materials, 2015, 5, 3599-3606(3598).

[17] S. Jeong, C. Cho, H. Kang, K.-H. Kim, Y. Yuk, J. Y. Park, B. J. Kim and J.-Y. Lee, ACS Nano, 2015, 9, 2773-2782.

[18] J.-D. Chen, C. Cui, Y.-Q. Li, L. Zhou, Q.-D. Ou, C. Li, Y. Li and J.-X. Tang, Advanced Materials, 2015, 27, 1035-1041.

[19] W. Shen, G. Zhao, X. Zhang, F. Bu, J. Yun and J. Tang, Nanomaterials, 2020, 10, 944.

[20] K. Yao, X.-K. Xin, C.-C. Chueh, K.-S. Chen, Y.-X. Xu and A. K.-Y. Jen, Advanced Functional Materials, 2015, 25, 567-574.
